# Supplementary material
Source: PubMed Central journal article supplement (PMC419913)
Supplement: 7600236s4.pdf [file 7600236s4.pdf]

| <b>Supplemental Table III. Summary of sequence results for <i>ku70 tert mre11</i> fusion clones</b> |                 |                       |                       |                    |                 |           |          |
|-----------------------------------------------------------------------------------------------------|-----------------|-----------------------|-----------------------|--------------------|-----------------|-----------|----------|
| Clone number                                                                                        | Chromosome arms | Source of telo repeat | Length of telo repeat | Chromosome deleted | Deletion length | Insertion | Homology |
| <b>Telomere-telomere</b>                                                                            |                 |                       |                       |                    |                 |           |          |
| 1                                                                                                   | 1R-3L           | both                  | 410                   | NA                 | NA              | ND        | ND       |
| 2                                                                                                   | 1R-3L           | both                  | 491                   | NA                 | NA              | ND        | ND       |
| 3                                                                                                   | 1R-3L           | both                  | 906                   | NA                 | NA              | ND        | ND       |
| 4                                                                                                   | 1R-3L           | both                  | 978                   | NA                 | NA              | ND        | ND       |
| 5                                                                                                   | 1R-3L           | both                  | 806                   | NA                 | NA              | ND        | ND       |
| 6                                                                                                   | 1R-3L           | both                  | 533                   | NA                 | NA              | ND        | ND       |
| 7                                                                                                   | 1R-3L           | both                  | 573                   | NA                 | NA              | ND        | ND       |
| 8                                                                                                   | 1R-3L           | both                  | 734                   | NA                 | NA              | ND        | ND       |
| 9                                                                                                   | 1R-3L           | both                  | 642                   | NA                 | NA              | ND        | ND       |
| 10                                                                                                  | 1R-3L           | both                  | 851                   | NA                 | NA              | ND        | ND       |
| 11                                                                                                  | 1R-3L           | both                  | 522                   | NA                 | NA              | ND        | ND       |
| <b>Telomere-subtelomere</b>                                                                         |                 |                       |                       |                    |                 |           |          |
| 12                                                                                                  | 1R-3L           | 1R                    | 189                   | 3L                 | 328             | 6         | 0        |
| 13                                                                                                  | 1R-3L           | 3L                    | 316                   | 1R                 | 432             | 0         | 3        |
| 14                                                                                                  | 1R-3L           | 3L                    | 357                   | 1R                 | 61              | 0         | 3        |
| 15                                                                                                  | 1R-3L           | 3L                    | 375                   | 1R                 | 495             | 8         | 0        |
| 16                                                                                                  | 1R-3L           | 3L                    | 267                   | 1R                 | 455             | 0         | 4        |
| 17                                                                                                  | 1R-3L           | 3L                    | 351                   | 1R                 | 295             | 0         | 1        |
| 18                                                                                                  | 1R-3L           | 3L                    | 364                   | 1R                 | 330             | 0         | 0        |
| 19                                                                                                  | 1R-3L           | 3L                    | 355                   | 1R                 | 151             | 18        | 0        |
| 20                                                                                                  | 1R-3L           | 3L                    | 268                   | 1R                 | 37              | 11        | 0        |
| 21                                                                                                  | 1R-3L           | 3L                    | 404                   | 1R                 | 153             | 0         | 2        |

**Supplemental Table III.** Summary of sequence results for fusion PCR clones obtained from a *ku70 tert mre11* mutant.
